# Supplementary material
Source: Springer Nature journal article supplement (https://www.springermedizin.de/resource/supplementary/13054_2013_2875_MOESM18_ESM.pdf/9714066)

**A****Gamma**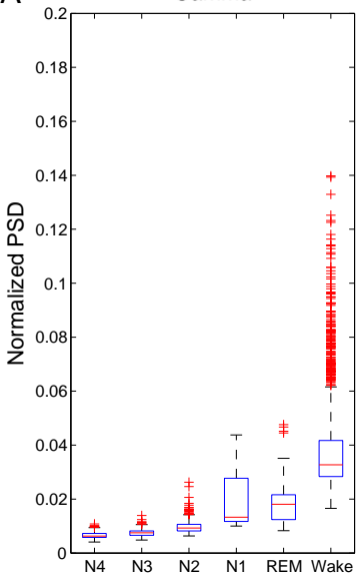**B****Delta**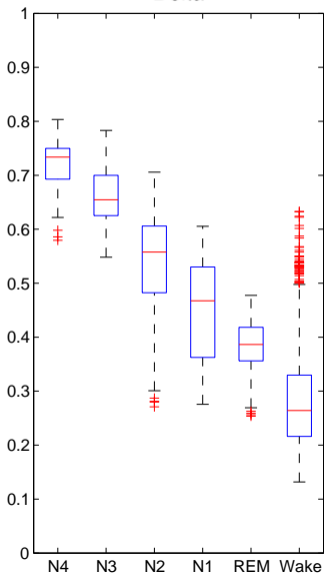

Supplement: MOESM18 [file 9714066]
